# Supplementary material for: Comparing the Use of Spatially Explicit Indicators and Conventional Indicators in the Evaluation of Healthy Cities: A Case Study in Shenzhen, China
Source: PubMed Central journal article supplement (PMC7601529; doi:10.3390/ijerph17207409), 2020-10-12
Supplement: ijerph-17-07409-s001.pdf [file ijerph-17-07409-s001.pdf]

## Supplementary Materials

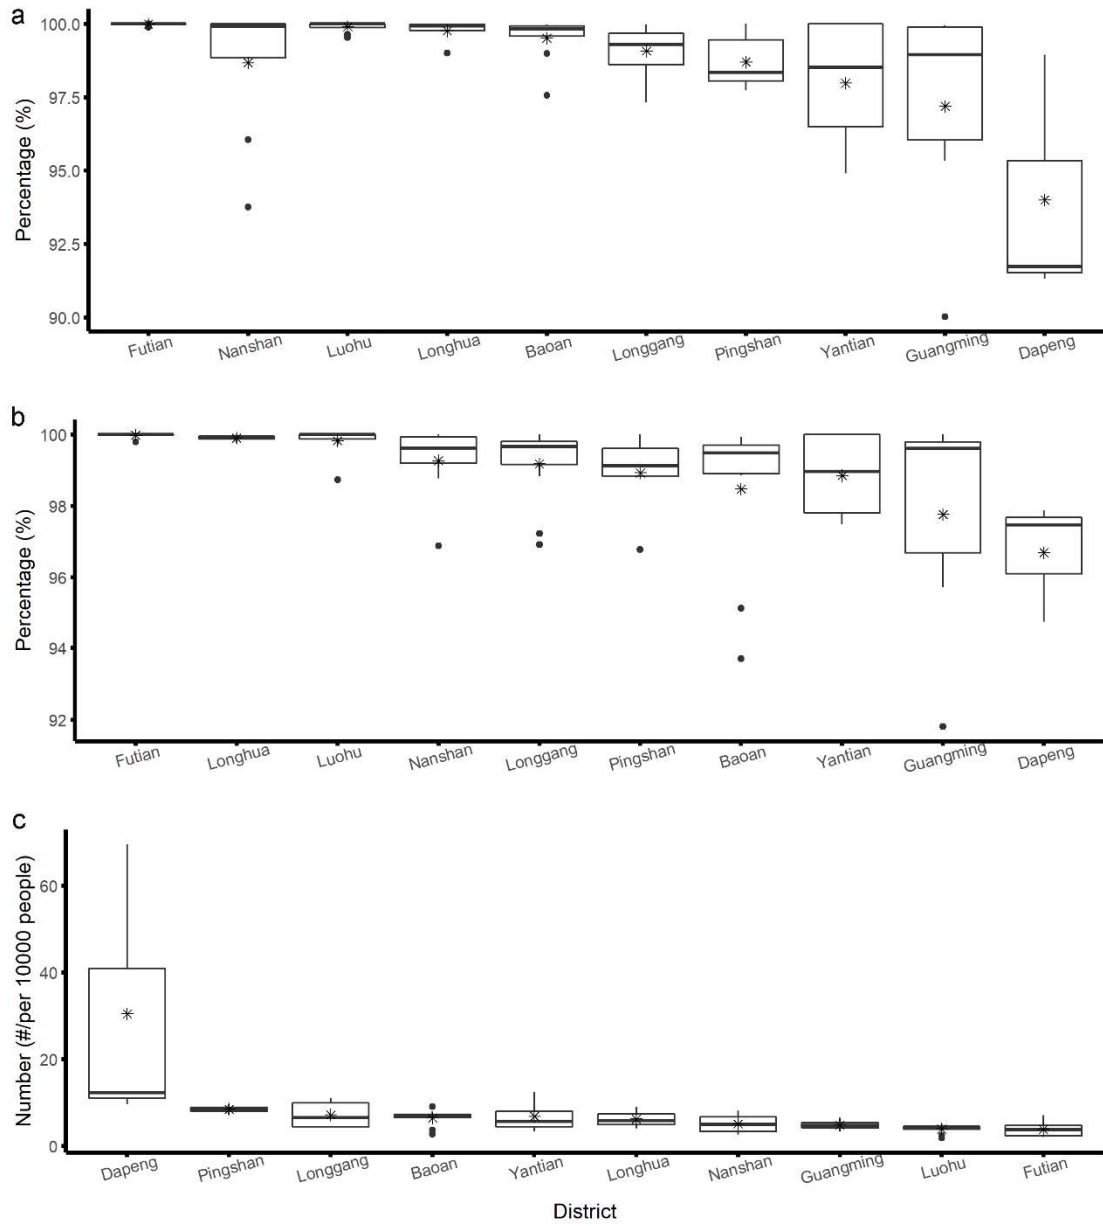

**Figure S1.** Values of indicators of transportation at the sub-district level grouped by each district. The districts were ordered according to the rankings at the district level. The stars are mean values. **(a)** The percentage of residential buildings  $\leq 1000$  m to public transit stops and stations; **(b)** The percentage of WeChat population  $\leq 1000$  m to public transit stops and stations **(c)** Number of public transit stops and stations per 10,000 people.

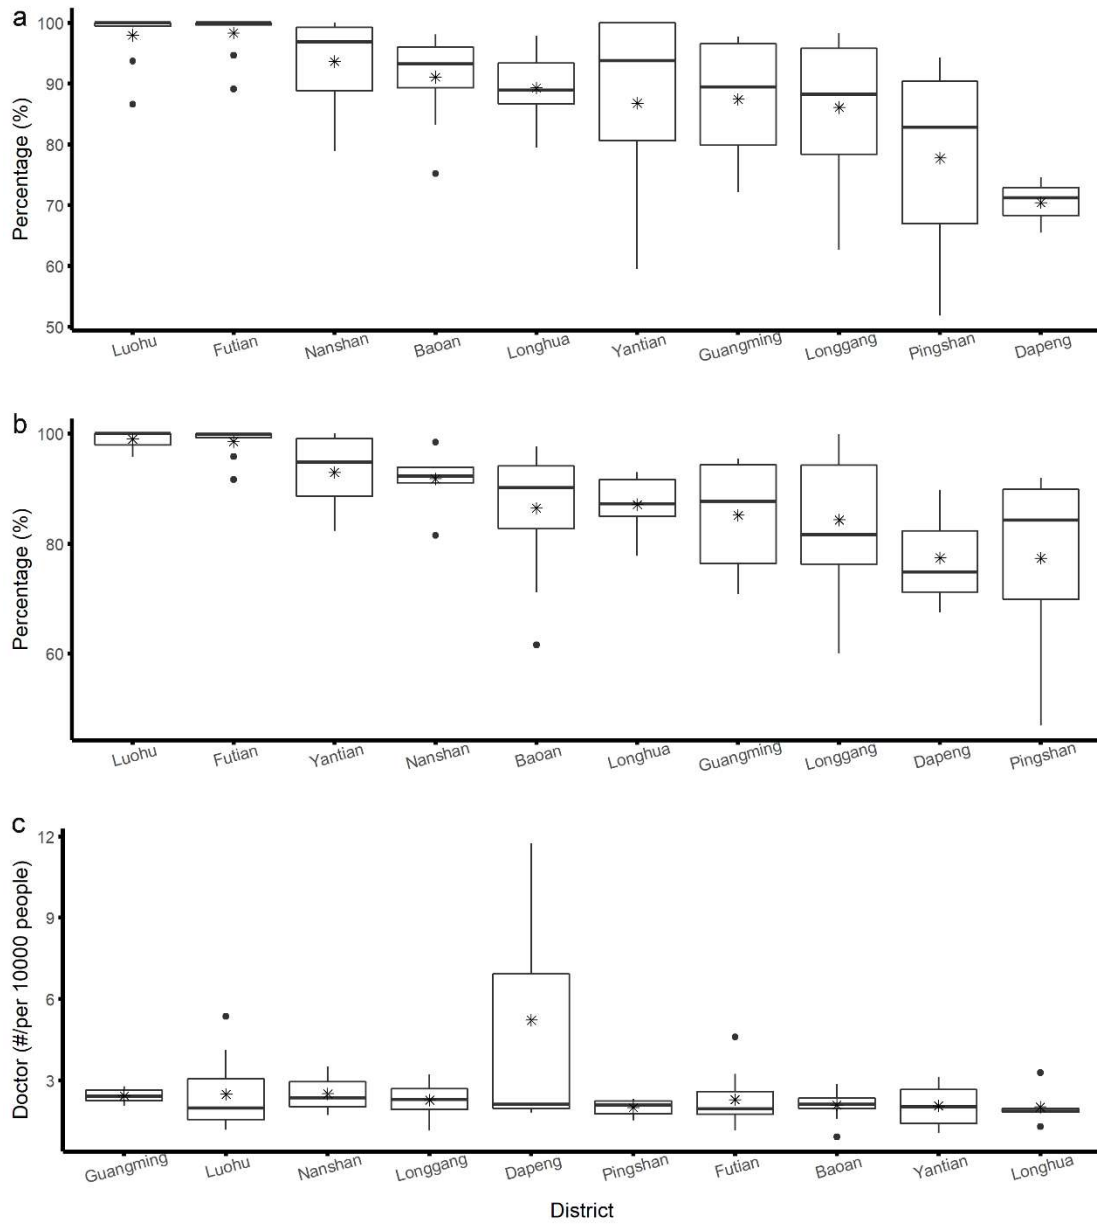

**Figure S2.** Values of indicators of health services at the sub-district level grouped by each district. The districts were ordered according to the rankings at the district level. The stars are mean values. (a) The percentage of residential buildings  $\leq 1000$  m to community health centers; (b) The percentage of WeChat population  $\leq 1000$  m to community health centers; (c) Number of doctors in community health centers per 10,000 people.

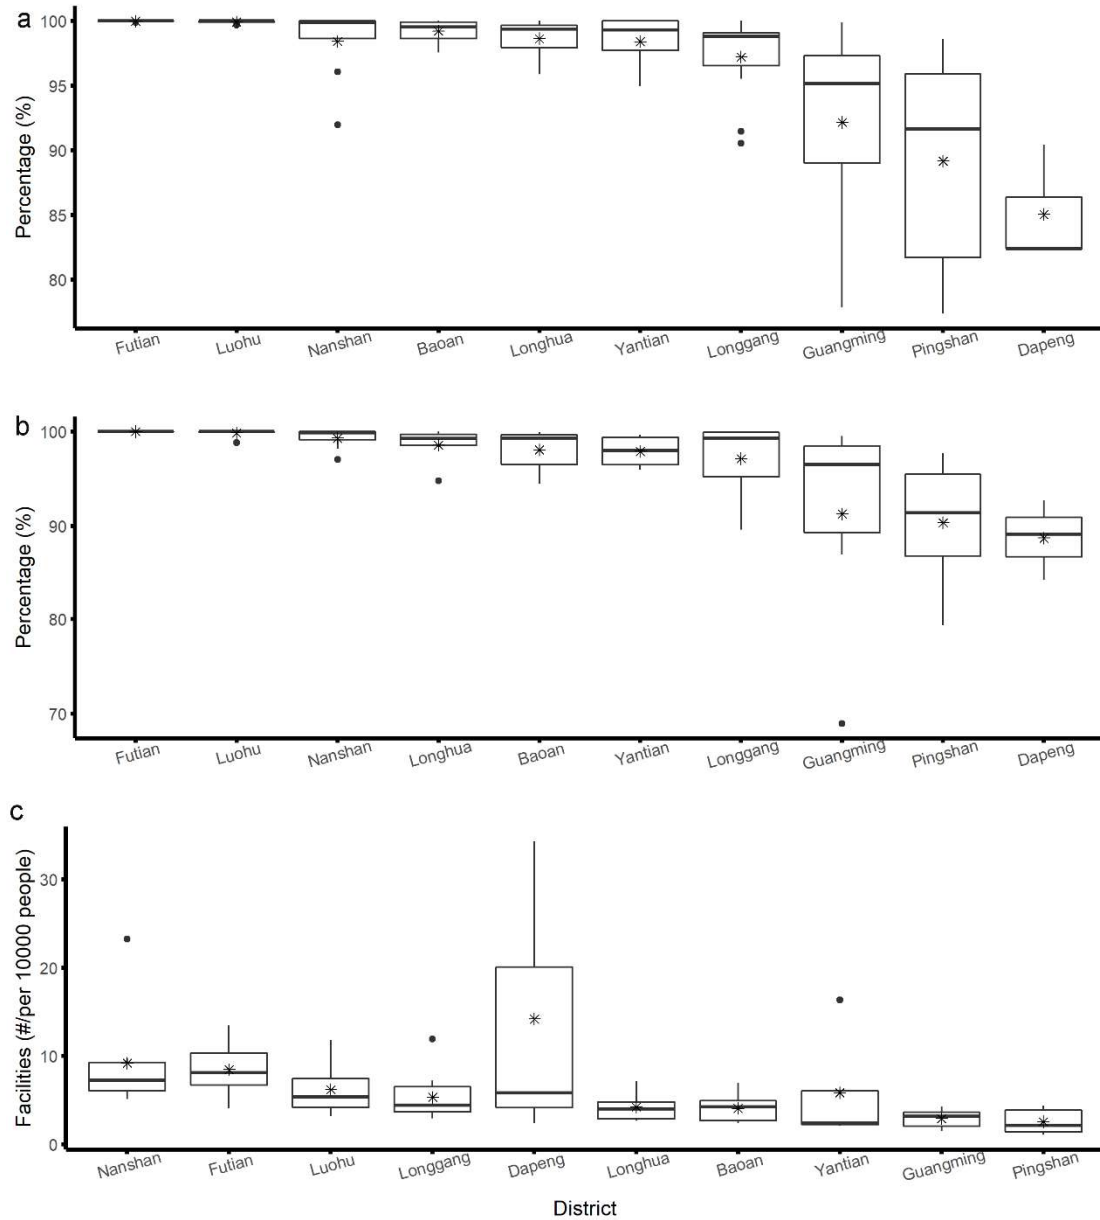

**Figure S3.** The values of indicators of sports facilities at the sub-district level grouped by each district. The districts were ordered according to the rankings at the district level. The stars are mean values. (a) The percentage of residential buildings  $\leq 1000$  m to sports facilities; (b) The percentage of WeChat population  $\leq 1000$  m to sports facilities; (c) Number of sports facilities per 10,000 people.
